# Supplementary material
Source: Springer Nature journal article supplement (https://www.springermedizin.de/resource/supplementary/12877_2001_2_MOESM1_ESM.pdf/9439322)

Ci

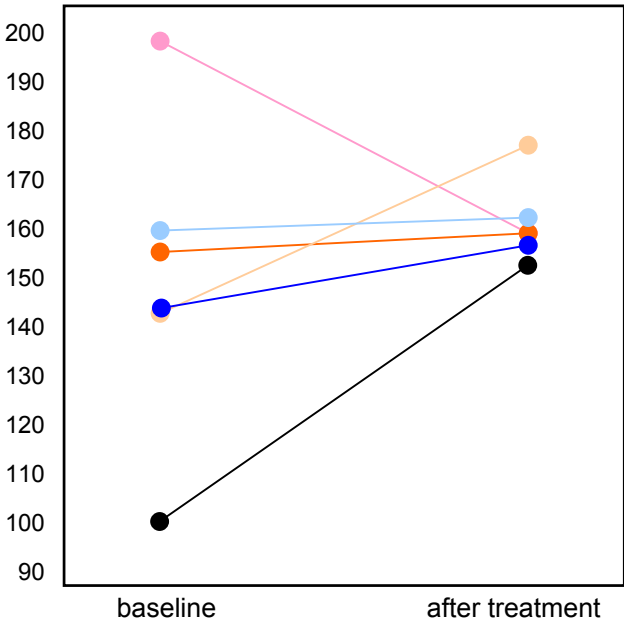

Supplement: MOESM1 [file 9439322]
